# Supplementary material for: Systems Pharmacology Based Study of the Molecular Mechanism of SiNiSan Formula for Application in Nervous and Mental Diseases
Source: Evid Based Complement Alternat Med. 2016 Dec 12;2016:9146378. doi: 10.1155/2016/9146378 (PMC5183803; doi:10.1155/2016/9146378)
Supplement: Supplementary file 1 — This table contains the ID, compound name, CAS number, source of ingredient, and relevant pharmacological parameters for the 60 ingredients. And the symbol “∗” from the first column is used to denote the corresponding hydrolyzate of the ingredient. [file 9146378.f1.xlsx]

## Sheet: TableS1
Active ingredients and ADME screening of herbal medicines
No.	Compound	CAS	OB (%)	DL	BBB	herbal medicine
CH22	Areapillin	83162-82-7	55.15	0.41	penetrating	Radix Bupleuri
CH26	Octalupine	6809-89-8	47.82	0.28	penetrating	Radix Bupleuri
CH29	Saikogenin G	18175-79-6	51.84	0.63	non-penetrating	Radix Bupleuri
CH39	Sainfuran	90664-32-7	81.61	0.23	penetrating	Radix Bupleuri
CH40	Thymonin	76844-67-2	43.16	0.41	non-penetrating	Radix Bupleuri
CH54*	saikosaponin c_qt	20736-08-7	30.52	0.63	non-penetrating	Radix Bupleuri
CH57	α-spinasterol	481-18-5	42.98	0.76	penetrating	Radix Bupleuri
CH60	Cubebin	18423-69-3	57.13	0.64	non-penetrating	Radix Bupleuri
CH8	Stigmasterol	83-48-7	43.83	0.76	penetrating	Radix Bupleuri
GC10	Morusin	62596-29-6	50.22	0.76	penetrating	Radix Glycyrrhizae
GC12	Liquiritigenin	578-86-9	67.9	0.18	penetrating	Radix Glycyrrhizae
GC13	Medicarpin	32383-76-9	49.35	0.34	penetrating	Radix Glycyrrhizae
GC16	naringenin	480-41-1	53	0.21	non-penetrating	Radix Glycyrrhizae
						Immature Bitter Orange
GC18	Shinflavanone	157414-03-4	31.79	0.72	penetrating	Radix Glycyrrhizae
GC20	glyasperin B	142488-54-8	67.14	0.44	penetrating	Radix Glycyrrhizae
GC21	glyasperin F	145382-61-2	76.23	0.54	penetrating	Radix Glycyrrhizae
GC22	glyasperins D	142561-10-2	33.79	0.43	penetrating	Radix Glycyrrhizae
GC23	Semilicoisoflavone B	129280-33-7	53.01	0.55	non-penetrating	Radix Glycyrrhizae
GC24	Phaseolinisoflavan	40323-57-7	56.27	0.45	penetrating	Radix Glycyrrhizae
GC25	Kanzonol U	none	64.03	0.38	penetrating	Radix Glycyrrhizae
GC27	Licochalcone B	58749-23-8	75.13	0.19	non-penetrating	Radix Glycyrrhizae
GC32*	Glycyrrhizic Acid_qt	1405-86-3	31.78	0.55	non-penetrating	Radix Glycyrrhizae
GC33	Licoflavonol	60197-60-6	48.37	0.4	penetrating	Radix Glycyrrhizae
GC35	Gancaonin B	124596-86-7	54.29	0.45	penetrating	Radix Glycyrrhizae
GC36	Gancaonin C	124596-87-8	63	0.42	non-penetrating	Radix Glycyrrhizae
GC37	Gancaonin D	124596-88-9	48.72	0.51	non-penetrating	Radix Glycyrrhizae
GC39	5,7-dihydroxy-3-(2-hydroxy-4-methoxy-phenyl)-6-(3-methylbut-2-enyl)chromone	51225-30-0	58.2	0.45	penetrating	Radix Glycyrrhizae
GC43	3-[4,6-dihydroxy-2-methoxy-3-(3-methylbut-2-enyl)phenyl]-7-hydroxy-chromone	161099-37-2	68.63	0.44	penetrating	Radix Glycyrrhizae
GC49	Glabridin	59870-68-7	48.09	0.47	penetrating	Radix Glycyrrhizae
GC5	Ononin	486-62-4	56.93	0.78	non-penetrating	Radix Glycyrrhizae
GC51	Glabrene	60008-03-9	63.58	0.44	penetrating	Radix Glycyrrhizae
GC56	Isoglycyrol	23013-86-7	44.1	0.84	penetrating	Radix Glycyrrhizae
GC6	formononetin	485-72-3	68.33	0.21	penetrating	Radix Glycyrrhizae
GC61	isoglabrolide	10376-64-4	43.04	0.64	penetrating	Radix Glycyrrhizae
GC65	Kanzonol F	152511-44-9	31.45	0.89	penetrating	Radix Glycyrrhizae
GC66	8-prenylated eriodictyol	none	60	0.4	non-penetrating	Radix Glycyrrhizae
GC67	Gancaonin G	126716-34-5	41.37	0.39	penetrating	Radix Glycyrrhizae
GC69	Glyasperins M	none	41.6	0.59	penetrating	Radix Glycyrrhizae
GC7	Calycosin	20575-57-9	47.73	0.24	non-penetrating	Radix Glycyrrhizae
GC70	Corylifolinin	20784-50-3	36.09	0.27	penetrating	Radix Glycyrrhizae
GC72	18α-hydroxyglycyrrhetic acid	none	40.85	0.71	non-penetrating	Radix Glycyrrhizae
GC73	Odoratin	41929-26-4	53.61	0.3	penetrating	Radix Glycyrrhizae
GC8	licochalcone a	58749-22-7	42.78	0.29	penetrating	Radix Glycyrrhizae
SY11	beta-sitosterol	83-46-5	36.91	0.75	penetrating	Radix Paeoniae Alba
SY12	kaempferol	520-18-3	42.06	0.24	non-penetrating	Radix Paeoniae Alba
SY20*	albiflorin R1_qt	39011-90-0	70.36	0.34	non-penetrating	Radix Paeoniae Alba
SY23	Lactiflorin	88623-95-4	57.55	0.8	non-penetrating	Radix Paeoniae Alba
SY26	paeoniflorin	23180-57-6	32.07	0.4	non-penetrating	Radix Paeoniae Alba
SY28*	albiflorin_qt	39011-90-0	66.64	0.33	non-penetrating	Radix Paeoniae Alba
SY29	benzoyl paeoniflorin	38642-49-8	31.27	0.75	non-penetrating	Radix Paeoniae Alba
SY8	Mudanpioside C	172760-03-1	30.72	0.5	non-penetrating	Radix Paeoniae Alba
ZS12	AC1LDVZP	none	67.8	0.27	non-penetrating	Immature Bitter Orange
ZS15	3',4',5,7-Tetramethoxyflavone	855-97-0	45	0.37	penetrating	Immature Bitter Orange
ZS17	Citrusin B	105279-10-5	40.8	0.71	non-penetrating	Immature Bitter Orange
ZS2	Ichangin	10171-61-6	70.8	0.79	non-penetrating	Immature Bitter Orange
ZS20	Isosinensetin	none	89.54	0.44	penetrating	Immature Bitter Orange
ZS24	isosakuranetin-7-rutinoside	none	41.24	0.72	non-penetrating	Immature Bitter Orange
ZS27	poncimarin	55916-48-8	34.22	0.35	penetrating	Immature Bitter Orange
ZS29*	citrusin A_qt	none	36.44	0.36	non-penetrating	Immature Bitter Orange
ZS8*	neohesperidin qt	none	61.75	0.27	non-penetrating	Immature Bitter Orange
*These compounds are not existed in the databases above. We added these compounds because of we considered whether the metabolite of the ingredients could be the potential active compoundfromSinisan formula.

## Sheet: TableS2
target Gene ID	Uniprot
HTR6	UniProtKB=P50406
PRKCA	UniProtKB=P17252
LPAR3	UniProtKB=Q9UBY5
GRB2	UniProtKB=P62993
CALM1	UniProtKB=P62158
ACHE	UniProtKB=P22303
CHRNE	UniProtKB=Q04844
CCR6	UniProtKB=P51684
PARP2	UniProtKB=Q9UGN5
FCER2	UniProtKB=P06734
DDR2	UniProtKB=Q16832
ADH1A	UniProtKB=P07327
HSD17B3	UniProtKB=P37058
PTGS2	UniProtKB=P35354
NR1H2	UniProtKB=P55055
CHRM2	UniProtKB=P08172
MPO	UniProtKB=P05164
ADORA1	UniProtKB=P30542
SLC16A7	UniProtKB=O60669
PDGFRB	UniProtKB=P09619
ALPPL2	UniProtKB=P10696
CPB2	UniProtKB=Q96IY4
CHRNA4	UniProtKB=P43681
ADRB2	UniProtKB=P07550
DRD1	UniProtKB=P21728
ALB	UniProtKB=P02768
DHCR7	UniProtKB=Q9UBM7
FLT3	UniProtKB=P36888
AMD1	UniProtKB=P17707
SENP6	UniProtKB=Q9GZR1
NOS1	UniProtKB=P29475
TNFRSF1A	UniProtKB=P19438
BIRC7	UniProtKB=Q96CA5
HMGCR	UniProtKB=P04035
SV2A	UniProtKB=Q7L0J3
HTR5A	UniProtKB=Q86XA9
APC	UniProtKB=P25054
GLB1	UniProtKB=P16278
EDNRA	UniProtKB=P25101
EDNRB	UniProtKB=P24530
PRKCD	UniProtKB=Q05655
SFRP1	UniProtKB=Q8N474
ADCYAP1R1	UniProtKB=P41586
MAOA	UniProtKB=P21397
CYP2B6	UniProtKB=P20813
NTSR1	UniProtKB=P30989
NTSR2	UniProtKB=O95665
GRIN2B	UniProtKB=Q13224
AKR1B10	UniProtKB=O60218
FEN1	UniProtKB=P39748
SLC6A3	UniProtKB=Q01959
XPO1	UniProtKB=O14980
ELOVL6	UniProtKB=Q9H5J4
GSTP1	UniProtKB=P09211
ODC1	UniProtKB=P11926
GLRA1	UniProtKB=P23415
ALOX5	UniProtKB=P09917
GDA	UniProtKB=Q9Y2T3
PPP1CC	UniProtKB=P36873
IGFBP3	UniProtKB=P17936
DYRK1A	UniProtKB=Q13627
PLAA	UniProtKB=Q9Y263
CALCA	UniProtKB=P01258
CACNA1B	UniProtKB=Q00975
FUT6	UniProtKB=P51993
FUT7	UniProtKB=Q11130
UBE2I	UniProtKB=P63279
HTR1A	UniProtKB=P08908
ESR2	UniProtKB=Q92731
BMP4	UniProtKB=P12644
P4HA1	UniProtKB=P13674
HPSE	UniProtKB=Q9Y251
GSK3B	UniProtKB=P49841
POLB	UniProtKB=P06746
CA3	UniProtKB=P07451
GRM8	UniProtKB=O00222
ABCC1	UniProtKB=P33527
HSP90AA1	UniProtKB=P07900
AVPR2	UniProtKB=P30518
ADRA2B	UniProtKB=P18089
QTRT1	UniProtKB=Q9BXR0
HPGD	UniProtKB=P15428
FURIN	UniProtKB=P09958
PLA2G2A	UniProtKB=P14555
CDA	UniProtKB=P32320
CSNK2A1	UniProtKB=P68400
KCNQ1	UniProtKB=P51787
IDO1	UniProtKB=P14902
ENPEP	UniProtKB=Q07075
ICMT	UniProtKB=O60725
SLC10A1	UniProtKB=Q14973
CYP2C9	UniProtKB=P11712
CYP1A1	UniProtKB=P04798
PYGM	UniProtKB=P11217
SLC6A4	UniProtKB=P31645
TSPO	UniProtKB=P30536
TPSAB1	UniProtKB=Q15661
F3	UniProtKB=P13726
TUBB2B	UniProtKB=Q9BVA1
MMP13	UniProtKB=P45452
FSHR	UniProtKB=P23945
ADCY1	UniProtKB=Q08828
KISS1R	UniProtKB=Q969F8
DUOX2	UniProtKB=Q9NRD8
NR1H4	UniProtKB=Q96RI1
CHRM5	UniProtKB=P08912
AHR	UniProtKB=P35869
NR3C2	UniProtKB=P08235
ADORA3	UniProtKB=P33765
KDM2A	UniProtKB=Q9Y2K7
KMO	UniProtKB=O15229
MTNR1A	UniProtKB=P48039
RASGRP3	UniProtKB=Q8IV61
SAE1	UniProtKB=Q9UBE0
HTR2B	UniProtKB=P41595
GRM5	UniProtKB=P41594
HIF1AN	UniProtKB=Q9NWT6
RRM2	UniProtKB=P31350
MAPK14	UniProtKB=Q16539
MAPK10	UniProtKB=P53779
CYP24A1	UniProtKB=Q07973
KARS	UniProtKB=Q15046
PDE10	UniProtKB=Q9Y233
FDFT1	UniProtKB=P37268
FUCA1	UniProtKB=P04066
CDC7	UniProtKB=O00311
TYR	UniProtKB=P14679
TUBB	UniProtKB=P07437
RARA	UniProtKB=P10276
BChE	UniProtKB=P06276
KCNA5	UniProtKB=P22460
CXCR1	UniProtKB=P25024
HSD17B1	UniProtKB=P14061
AOC1	UniProtKB=P19801
FABP4	UniProtKB=P15090
MTNR1B	UniProtKB=P49286
CHRNA3	UniProtKB=P32297
VCP	UniProtKB=P55072
ALOX15	UniProtKB=P16050
CACNA1D	UniProtKB=Q01668
HRH3	UniProtKB=Q9Y5N1
ESRRA	UniProtKB=P11474
SMAD3	UniProtKB=P84022
CDK6	UniProtKB=Q00534
ADRA1B	UniProtKB=P35368
ITGAL	UniProtKB=P20701
CA1	UniProtKB=P00915
OPRM1	UniProtKB=P35372
ADRA2C	UniProtKB=P18825
SSTR2	UniProtKB=P30874
MMP9	UniProtKB=P14780
CTDSP1	UniProtKB=Q9GZU7
BIRC2	UniProtKB=Q13490
ATP1A1	UniProtKB=P05023
CCK	UniProtKB=P06307
APP	UniProtKB=P05067
OXTR	UniProtKB=P30559
CYP2D6	UniProtKB=P10635
CACNA2D1	UniProtKB=P54289
NISCH	UniProtKB=Q9Y2I1
LACTB2	UniProtKB=Q53H82
PTGFR	UniProtKB=P43088
MST1R	UniProtKB=Q04912
LTA4H	UniProtKB=P09960
SLC10A2	UniProtKB=Q12908
DHFR	UniProtKB=P00374
SLC6A2	UniProtKB=P23975
SPHK2	UniProtKB=Q9NRA0
BACE1	UniProtKB=P56817
OPRD1	UniProtKB=P41143
CPN1	UniProtKB=P15169
PDF	UniProtKB=Q9HBH1
HSD17B2	UniProtKB=P37059
P4HTM	UniProtKB=Q9NXG6
PSMB8	UniProtKB=P28062
NDUFAB1	UniProtKB=O14561
ITGA2B	UniProtKB=P08514
TUBB1	UniProtKB=Q9H4B7
EP300	UniProtKB=Q09472
MAP2K4	UniProtKB=P45985
DGAT1	UniProtKB=O75907
LTB4R2	UniProtKB=Q9NPC1
FKBP5	UniProtKB=Q13451
CALCRL	UniProtKB=Q16602
ALOX12	UniProtKB=P18054
DRD5	UniProtKB=P21918
HTR2C	UniProtKB=P28335
CA5B	UniProtKB=Q9Y2D0
CA9	UniProtKB=Q16790
PLA2G4B	UniProtKB=P0C869
ADRA2A	UniProtKB=P08913
ADORA2A	UniProtKB=P29274
LCK	UniProtKB=P06239
UGT2B7	UniProtKB=P16662
CAMK2B	UniProtKB=Q13554
CYP3A4	UniProtKB=P08684
TNKS2	UniProtKB=Q9H2K2
CCL5	UniProtKB=P13501
OPRK1	UniProtKB=P41145
DHODH	UniProtKB=Q02127
WEE1	UniProtKB=P30291
SCD	UniProtKB=O00767
ERCC5	UniProtKB=P28715
STS	UniProtKB=P08842
CYP1B1	UniProtKB=Q16678
PRKCB	UniProtKB=P05771
SLC11A2	UniProtKB=P49281
AR	UniProtKB=P10275
CES2	UniProtKB=O00748
GRIN2A	UniProtKB=Q12879
LNPEP	UniProtKB=Q9UIQ6
BHMT	UniProtKB=Q93088
CYP1A2	UniProtKB=P05177
NOX4	UniProtKB=Q9NPH5
HEXB	UniProtKB=P07686
GRIK1	UniProtKB=P39086
GRIK2	UniProtKB=Q13002
GLI1	UniProtKB=P08151
PHF8	UniProtKB=Q9UPP1
MC4R	UniProtKB=P32245
HRAS	UniProtKB=P01112
SLC18A3	UniProtKB=Q16572
MMP12	UniProtKB=P39900
GART	UniProtKB=P22102
GABBR1	UniProtKB=Q9UBS5
GABRA6	UniProtKB=Q16445
RAMP1	UniProtKB=O60894
CHRM3	UniProtKB=P20309
CHRM1	UniProtKB=P11229
CHRM4	UniProtKB=P08173
NR3C1	UniProtKB=P04150
FPGS	UniProtKB=Q05932
PLA2G10	UniProtKB=O15496
ADAM9	UniProtKB=Q13443
ABCG2	UniProtKB=Q9UNQ0
CHRNA7	UniProtKB=P36544
C5AR1	UniProtKB=P21730
CHAT	UniProtKB=P28329
MCHR1	UniProtKB=Q99705
YARS	UniProtKB=P54577
MGEA5	UniProtKB=O60502
SRD5A1	UniProtKB=P18405
HTR1D	UniProtKB=P28221
P2Y12	UniProtKB=Q9H244
ESR1	UniProtKB=P03372
SELL	UniProtKB=P14151
ATP2A1	UniProtKB=O14983
CA2	UniProtKB=P00918
BDKRB1	UniProtKB=P46663
ITGA4	UniProtKB=P13612
TRPC4	UniProtKB=Q9UBN4
MMP2	UniProtKB=P08253
DNM1	UniProtKB=Q05193
ACOX1	UniProtKB=Q15067
PTPN1	UniProtKB=P18031
PNMT	UniProtKB=P11086
PRF1	UniProtKB=P14222
TDO2	UniProtKB=P48775
CYP2E1	UniProtKB=P05181
EPHA3	UniProtKB=P29320
SLC22A6	UniProtKB=Q4U2R8
MAOB	UniProtKB=P27338
HSD11B2	UniProtKB=P80365
CD38	UniProtKB=P28907
GAA	UniProtKB=P10253
KCNMA1	UniProtKB=Q12791
MAPT	UniProtKB=P10636
TLR4	UniProtKB=O00206
PTGER4	UniProtKB=P35408
PTGS1	UniProtKB=P23219
NT5E	UniProtKB=P21589
CHRNA10	UniProtKB=Q9GZZ6
XDH	UniProtKB=P47989
AKR1C2	UniProtKB=P52895
CTNNB1	UniProtKB=P35222
F2R	UniProtKB=P25116
ACLY	UniProtKB=P53396
SMO	UniProtKB=Q99835
ADRB1	UniProtKB=P08588
ACACB	UniProtKB=O00763
EBP	UniProtKB=Q15125
HRH1	UniProtKB=P35367
SRD5A2	UniProtKB=P31213
SELP	UniProtKB=P16109
CDK5	UniProtKB=Q00535
CDK2	UniProtKB=P24941
CDK1	UniProtKB=P06493
HTR2A	UniProtKB=P28223
CA7	UniProtKB=P43166
CASP2	UniProtKB=P42575
MMP3	UniProtKB=P08254
CYP2A6	UniProtKB=P11509
BCL2A1	UniProtKB=Q16548
KDM4D	UniProtKB=Q6B0I6
Klf5	UniProtKB=Q13887
HCN1	UniProtKB=O60741
EHMT2	UniProtKB=Q96KQ7
PPP2R2A	UniProtKB=P63151
MIF	UniProtKB=P14174
SLC5A7	UniProtKB=Q9GZV3
LAP3	UniProtKB=P28838
CES1	UniProtKB=P23141
EPAS1	UniProtKB=Q99814
PLCG2	UniProtKB=P16885
PDE2A	UniProtKB=O00408
PPP3CA	UniProtKB=Q08209
CBR1	UniProtKB=P16152
SPHK1	UniProtKB=Q9NYA1
DPYD	UniProtKB=Q12882
ADCY5	UniProtKB=O95622
CHRND	UniProtKB=Q07001
AOC3	UniProtKB=Q16853
SLC16A1	UniProtKB=P53985
PIM1	UniProtKB=P11309
MAN2A1	UniProtKB=Q16706
DRD3	UniProtKB=P35462
DRD4	UniProtKB=P21917
MLNR	UniProtKB=O43193
HSPB1	UniProtKB=P04792
ALDH2	UniProtKB=P05091
SIGMAR1	UniProtKB=Q99720
HTR3A	UniProtKB=P46098
SRC	UniProtKB=P12931
CNR2	UniProtKB=P34972
P2RX3	UniProtKB=P56373

## Sheet: tableS3
ingredients from herbal medicines	protein name	heral medicine
Citrusin B	Purinergic receptor P2RY12	Immature Bitter Orange
Citrusin B	Bifunctional protein NCOAT	Immature Bitter Orange
Citrusin B	EDNRB	Immature Bitter Orange
Citrusin B	Pituitary adenylate cyclase-activating polypeptide type I receptor	Immature Bitter Orange
Citrusin B	Platelet-derived growth factor receptor beta	Immature Bitter Orange
Citrusin B	Tubulin beta chain	Immature Bitter Orange
Citrusin B	5-hydroxytryptamine receptor 2A (5-HT-2A)	Immature Bitter Orange
Citrusin B	Tubulin beta-1 chain	Immature Bitter Orange
Citrusin B	G-protein Coupled Receptor 54	Immature Bitter Orange
Citrusin B	Endothelin receptor ET-A	Immature Bitter Orange
Citrusin B	Integrin alpha-IIb	Immature Bitter Orange
isosakuranetin-7-rutinoside	Calcitonin gene-related peptide type 1 receptor/Receptor activity-modifying protein 1	Immature Bitter Orange
isosakuranetin-7-rutinoside	G-protein Coupled Receptor 54	Immature Bitter Orange
isosakuranetin-7-rutinoside	GRB2	Immature Bitter Orange
isosakuranetin-7-rutinoside	EDNRB	Immature Bitter Orange
isosakuranetin-7-rutinoside	phospholipase D2 isoform PLD2A	Immature Bitter Orange
isosakuranetin-7-rutinoside	Endothelin receptor ET-A	Immature Bitter Orange
isosakuranetin-7-rutinoside	5-hydroxytryptamine receptor 2A (5-HT-2A)	Immature Bitter Orange
isosakuranetin-7-rutinoside	Integrin alpha-IIb	Immature Bitter Orange
isosakuranetin-7-rutinoside	Cystinyl aminopeptidase	Immature Bitter Orange
isosakuranetin-7-rutinoside	Activated Protein C (APC)	Immature Bitter Orange
isosakuranetin-7-rutinoside	melanocortin receptor 4	Immature Bitter Orange
isosakuranetin-7-rutinoside	Bifunctional protein NCOAT	Immature Bitter Orange
isosakuranetin-7-rutinoside	Purinergic receptor P2RY12	Immature Bitter Orange
Mudanpioside C	phospholipase D2 isoform PLD2A	Radix Paeoniae Alba
Mudanpioside C	C-C motif chemokine 5	Radix Paeoniae Alba
Mudanpioside C	RAS guanyl releasing protein 3	Radix Paeoniae Alba
Mudanpioside C	G-protein Coupled Receptor 54	Radix Paeoniae Alba
Mudanpioside C	Secreted frizzled-related protein 1	Radix Paeoniae Alba
Mudanpioside C	Cystinyl aminopeptidase	Radix Paeoniae Alba
Mudanpioside C	Calcitonin gene-related peptide type 1 receptor/Receptor activity-modifying protein 1	Radix Paeoniae Alba
Mudanpioside C	EDNRB	Radix Paeoniae Alba
Mudanpioside C	Endothelin receptor ET-A	Radix Paeoniae Alba
Mudanpioside C	Brain adenylate cyclase 1	Radix Paeoniae Alba
Mudanpioside C	5-hydroxytryptamine receptor 2A (5-HT-2A)	Radix Paeoniae Alba
Mudanpioside C	Catenin beta-1	Radix Paeoniae Alba
Lactiflorin	Brain adenylate cyclase 1	Radix Paeoniae Alba
Lactiflorin	Liver X Receptor beta (LXR-beta)	Radix Paeoniae Alba
Ononin	5-hydroxytryptamine receptor 2A (5-HT-2A)	Radix Glycyrrhizae
Ononin	Diacyl Glycerolacyltransferase 1 (DGAT1)	Radix Glycyrrhizae
Ononin	Bifunctional protein NCOAT	Radix Glycyrrhizae
Ononin	Tubulin beta chain	Radix Glycyrrhizae
Ononin	Microtubule-associated protein tau	Radix Glycyrrhizae
Ononin	Smoothened homolog	Radix Glycyrrhizae
Ononin	Kruppel-like factor 5	Radix Glycyrrhizae
citrusin A_qt	Tubulin beta chain	Immature Bitter Orange
citrusin A_qt	Estrogen-related receptor alpha	Immature Bitter Orange
citrusin A_qt	Tubulin beta-1 chain	Immature Bitter Orange
citrusin A_qt	5-hydroxytryptamine receptor 2A (5-HT-2A)	Immature Bitter Orange
citrusin A_qt	Integrin alpha-IIb	Immature Bitter Orange
benzoyl paeoniflorin	Dual specificity mitogen-activated protein kinase kinase 4	Radix Paeoniae Alba
benzoyl paeoniflorin	Monocarboxylate Transporter 1	Radix Paeoniae Alba
benzoyl paeoniflorin	Cystinyl aminopeptidase	Radix Paeoniae Alba
benzoyl paeoniflorin	Cholecystokinin	Radix Paeoniae Alba
benzoyl paeoniflorin	G-protein Coupled Receptor 54	Radix Paeoniae Alba
benzoyl paeoniflorin	Voltage-gated L-type calcium channel alpha-1D subunit	Radix Paeoniae Alba
benzoyl paeoniflorin	Beta-lactamase type II	Radix Paeoniae Alba
benzoyl paeoniflorin	Brain adenylate cyclase 1	Radix Paeoniae Alba
benzoyl paeoniflorin	GRB2	Radix Paeoniae Alba
benzoyl paeoniflorin	Secreted frizzled-related protein 1	Radix Paeoniae Alba
benzoyl paeoniflorin	Calcitonin gene-related peptide type 1 receptor/Receptor activity-modifying protein 1	Radix Paeoniae Alba
benzoyl paeoniflorin	Liver X Receptor beta (LXR-beta)	Radix Paeoniae Alba
benzoyl paeoniflorin	Histone-lysine N-methyltransferase, H3 lysine-9 specific 3	Radix Paeoniae Alba
benzoyl paeoniflorin	OXTR	Radix Paeoniae Alba
benzoyl paeoniflorin	phospholipase D2 isoform PLD2A	Radix Paeoniae Alba
benzoyl paeoniflorin	EDNRB	Radix Paeoniae Alba
benzoyl paeoniflorin	melanocortin receptor 4	Radix Paeoniae Alba
benzoyl paeoniflorin	Endothelin receptor ET-A	Radix Paeoniae Alba
benzoyl paeoniflorin	Thyroid oxidase 2	Radix Paeoniae Alba
Ichangin	Androgen Receptor	Immature Bitter Orange
Ichangin	Sodium/potassium-transporting ATPase alpha-1 chain	Immature Bitter Orange
Ichangin	Steroid 5-alpha-reductase 1	Immature Bitter Orange
Ichangin	Secreted frizzled-related protein 1	Immature Bitter Orange
Ichangin	Brain adenylate cyclase 1	Immature Bitter Orange
Gancaonin D	Estrogen-related receptor alpha	Radix Glycyrrhizae
Gancaonin D	Tubulin beta-1 chain	Radix Glycyrrhizae
Gancaonin D	Estrogen receptor 1	Radix Glycyrrhizae
Gancaonin D	5-hydroxytryptamine receptor 2A (5-HT-2A)	Radix Glycyrrhizae
Gancaonin D	Microtubule-associated protein tau	Radix Glycyrrhizae
albiflorin_qt	Brain adenylate cyclase 1	Radix Paeoniae Alba
albiflorin_qt	5-hydroxytryptamine receptor 2A (5-HT-2A)	Radix Paeoniae Alba
Gancaonin C	Estradiol 17-beta-dehydrogenase 1	Radix Glycyrrhizae
Gancaonin C	Arachidonate 5-lipoxygenase	Radix Glycyrrhizae
Gancaonin C	Estrogen receptor 1	Radix Glycyrrhizae
Gancaonin C	Amiloride-sensitive cation channel 3	Radix Glycyrrhizae
Gancaonin C	Tubulin beta chain	Radix Glycyrrhizae
Gancaonin C	5-hydroxytryptamine receptor 2A (5-HT-2A)	Radix Glycyrrhizae
albiflorin R1_qt	Dual specificity mitogen-activated protein kinase kinase 4	Radix Paeoniae Alba
albiflorin R1_qt	Brain adenylate cyclase 1	Radix Paeoniae Alba
saikosaponin c_qt	Isoprenylcysteine carboxyl methyltransferase	Radix Bupleuri
saikosaponin c_qt	Thyroid oxidase 2	Radix Bupleuri
saikosaponin c_qt	Secreted frizzled-related protein 1	Radix Bupleuri
saikosaponin c_qt	Brain adenylate cyclase 1	Radix Bupleuri
saikosaponin c_qt	Steroid 5-alpha-reductase 1	Radix Bupleuri
saikosaponin c_qt	Cannabinoid CB2 receptor	Radix Bupleuri
paeoniflorin	Brain adenylate cyclase 1	Radix Paeoniae Alba
18α-hydroxyglycyrrhetic acid	Brain adenylate cyclase 1	Radix Glycyrrhizae
18α-hydroxyglycyrrhetic acid	Steroid 5-alpha-reductase 1	Radix Glycyrrhizae
18α-hydroxyglycyrrhetic acid	Secreted frizzled-related protein 1	Radix Glycyrrhizae
18α-hydroxyglycyrrhetic acid	PTGER4	Radix Glycyrrhizae
18α-hydroxyglycyrrhetic acid	Cannabinoid CB2 receptor	Radix Glycyrrhizae
Saikogenin G	Secreted frizzled-related protein 1	Radix Bupleuri
Saikogenin G	Cannabinoid CB2 receptor	Radix Bupleuri
Saikogenin G	Steroid 5-alpha-reductase 1	Radix Bupleuri
Saikogenin G	Thyroid oxidase 2	Radix Bupleuri
Saikogenin G	Brain adenylate cyclase 1	Radix Bupleuri
kaempferol	Tubulin beta chain	Radix Paeoniae Alba
kaempferol	Large conductance calcium-activated potassium channel subfamily M alpha member 1 isoform b	Radix Paeoniae Alba
kaempferol	Multidrug resistance-associated protein 1	Radix Paeoniae Alba
kaempferol	CDK6	Radix Paeoniae Alba
kaempferol	Lysine-specific demethylase 4D-like	Radix Paeoniae Alba
kaempferol	Androgen Receptor (AR)	Radix Paeoniae Alba
kaempferol	5-Lipoxygenase	Radix Paeoniae Alba
kaempferol	Arachidonate 5-lipoxygenase	Radix Paeoniae Alba
kaempferol	17-beta-Hydroxysteroid Dehydrogenase 1 (17-beta-HSD1)	Radix Paeoniae Alba
kaempferol	Estrogen receptor 1	Radix Paeoniae Alba
kaempferol	c-Jun N-terminal kinase 3 (JNK3)	Radix Paeoniae Alba
kaempferol	Estradiol 17-beta-dehydrogenase 1	Radix Paeoniae Alba
kaempferol	Cytochrome P450 1A1	Radix Paeoniae Alba
kaempferol	17-beta-hydroxysteroid dehydrogenase type 3	Radix Paeoniae Alba
kaempferol	Monoamine Oxidase Type B (MAO-B)	Radix Paeoniae Alba
neohesperidin qt	17-beta-Hydroxysteroid Dehydrogenase 1 (17-beta-HSD1)	Immature Bitter Orange
neohesperidin qt	Dual specificity mitogen-activated protein kinase kinase 4	Immature Bitter Orange
neohesperidin qt	Estrogen receptor 1	Immature Bitter Orange
neohesperidin qt	Lysine-specific demethylase 4D-like	Immature Bitter Orange
neohesperidin qt	Arachidonate 5-lipoxygenase	Immature Bitter Orange
neohesperidin qt	Tubulin beta chain	Immature Bitter Orange
neohesperidin qt	5-hydroxytryptamine receptor 2A (5-HT-2A)	Immature Bitter Orange
Licochalcone B	17-beta-hydroxysteroid dehydrogenase type 3	Radix Glycyrrhizae
Licochalcone B	Arachidonate 5-lipoxygenase	Radix Glycyrrhizae
Licochalcone B	5-hydroxytryptamine receptor 2A (5-HT-2A)	Radix Glycyrrhizae
Licochalcone B	Cytochrome P450 1A1	Radix Glycyrrhizae
Licochalcone B	Integrin alpha-IIb	Radix Glycyrrhizae
Licochalcone B	Tubulin beta chain	Radix Glycyrrhizae
Licochalcone B	17-beta-Hydroxysteroid Dehydrogenase 1 (17-beta-HSD1)	Radix Glycyrrhizae
Thymonin	Arachidonate 5-lipoxygenase	Radix Bupleuri
Thymonin	Platelet-derived growth factor receptor beta	Radix Bupleuri
Thymonin	Cytochrome P450 1A1	Radix Bupleuri
Thymonin	Bifunctional protein NCOAT	Radix Bupleuri
Thymonin	Tubulin beta chain	Radix Bupleuri
Thymonin	Tubulin beta-1 chain	Radix Bupleuri
liquoric acid	Brain adenylate cyclase 1	Radix Glycyrrhizae
liquoric acid	Secreted frizzled-related protein 1	Radix Glycyrrhizae
liquoric acid	Steroid 5-alpha-reductase 1	Radix Glycyrrhizae
liquoric acid	PTGER4	Radix Glycyrrhizae
liquoric acid	Cannabinoid CB2 receptor	Radix Glycyrrhizae
liquoric acid	Thyroid oxidase 2	Radix Glycyrrhizae
liquoric acid	Isoprenylcysteine carboxyl methyltransferase	Radix Glycyrrhizae
liquoric acid	Cholinergic, Nicotinic Alpha4Beta2	Radix Glycyrrhizae
Calycosin	Arachidonate 5-lipoxygenase	Radix Glycyrrhizae
Calycosin	Tubulin beta chain	Radix Glycyrrhizae
Calycosin	Cytochrome P450 1A1	Radix Glycyrrhizae
Calycosin	estrogen alpha	Radix Glycyrrhizae
Calycosin	Estrogen receptor 1	Radix Glycyrrhizae
Calycosin	Microtubule-associated protein tau	Radix Glycyrrhizae
Calycosin	Monoamine Oxidase Type B (MAO-B)	Radix Glycyrrhizae
Calycosin	17-beta-Hydroxysteroid Dehydrogenase 1 (17-beta-HSD1)	Radix Glycyrrhizae
Calycosin	Lysine-specific demethylase 4D-like	Radix Glycyrrhizae
Cubebin	Integrin alpha-IIb	Radix Bupleuri
Cubebin	Tubulin beta chain	Radix Bupleuri
Cubebin	5-hydroxytryptamine receptor 2A (5-HT-2A)	Radix Bupleuri
Cubebin	Dual specificity mitogen-activated protein kinase kinase 4	Radix Bupleuri
Semilicoisoflavone B	Estrogen-related receptor alpha	Radix Glycyrrhizae
Semilicoisoflavone B	17-beta-Hydroxysteroid Dehydrogenase 1 (17-beta-HSD1)	Radix Glycyrrhizae
Semilicoisoflavone B	5-hydroxytryptamine receptor 2A (5-HT-2A)	Radix Glycyrrhizae
Semilicoisoflavone B	Monoamine Oxidase Type B (MAO-B)	Radix Glycyrrhizae
Semilicoisoflavone B	Arachidonate 5-lipoxygenase	Radix Glycyrrhizae
Semilicoisoflavone B	Amiloride-sensitive cation channel 3	Radix Glycyrrhizae
Semilicoisoflavone B	Cytochrome P450 1A1	Radix Glycyrrhizae
Semilicoisoflavone B	Microtubule-associated protein tau	Radix Glycyrrhizae
naringenin	17-beta-Hydroxysteroid Dehydrogenase 1 (17-beta-HSD1)	Radix Glycyrrhizae
naringenin	Estrogen receptor 1	Radix Glycyrrhizae
naringenin	Dual specificity mitogen-activated protein kinase kinase 4	Radix Glycyrrhizae
naringenin	Cytochrome P450 1A1	Radix Glycyrrhizae
naringenin	Arachidonate 5-lipoxygenase	Radix Glycyrrhizae
naringenin	Estradiol 17-beta-dehydrogenase 1	Radix Glycyrrhizae
naringenin	Calmodulin	Radix Glycyrrhizae
naringenin	mothers against decapentaplegic homolog 3	Radix Glycyrrhizae
naringenin	Lysine-specific demethylase 4D-like	Radix Glycyrrhizae
naringenin	5-hydroxytryptamine receptor 2A (5-HT-2A)	Radix Glycyrrhizae
naringenin	Large conductance calcium-activated potassium channel subfamily M alpha member 1 isoform b	Radix Glycyrrhizae
naringenin	Multidrug resistance-associated protein 1	Radix Glycyrrhizae
naringenin	Tubulin beta chain	Radix Glycyrrhizae
8-prenylated eriodictyol	5-hydroxytryptamine receptor 2A (5-HT-2A)	Radix Glycyrrhizae
8-prenylated eriodictyol	Estrogen receptor 1	Radix Glycyrrhizae
8-prenylated eriodictyol	Tubulin beta chain	Radix Glycyrrhizae
8-prenylated eriodictyol	Arachidonate 5-lipoxygenase	Radix Glycyrrhizae
8-prenylated eriodictyol	Estradiol 17-beta-dehydrogenase 1	Radix Glycyrrhizae
AC1LDVZP	Tubulin beta chain	Immature Bitter Orange
AC1LDVZP	Lysine-specific demethylase 4D-like	Immature Bitter Orange
AC1LDVZP	17-beta-Hydroxysteroid Dehydrogenase 1 (17-beta-HSD1)	Immature Bitter Orange
AC1LDVZP	Dual specificity mitogen-activated protein kinase kinase 4	Immature Bitter Orange
AC1LDVZP	Estrogen receptor 1	Immature Bitter Orange
AC1LDVZP	Arachidonate 5-lipoxygenase	Immature Bitter Orange
AC1LDVZP	5-hydroxytryptamine receptor 2A (5-HT-2A)	Immature Bitter Orange
AC1LDVZP	mothers against decapentaplegic homolog 3	Immature Bitter Orange
Areapillin	Tubulin beta-1 chain	Radix Bupleuri
Areapillin	Monoamine Oxidase B	Radix Bupleuri
Areapillin	Dual specificity tyrosine-phosphorylation-regulated kinase 1A	Radix Bupleuri
Areapillin	Platelet-derived growth factor receptor beta	Radix Bupleuri
Areapillin	Tubulin beta chain	Radix Bupleuri
Areapillin	Guanine deaminase	Radix Bupleuri
Areapillin	Arachidonate 5-lipoxygenase	Radix Bupleuri
Areapillin	5-hydroxytryptamine receptor 2A (5-HT-2A)	Radix Bupleuri
licochalcone a	5-hydroxytryptamine receptor 2A (5-HT-2A)	Radix Glycyrrhizae
licochalcone a	Integrin alpha-IIb	Radix Glycyrrhizae
licochalcone a	Estrogen-related receptor alpha	Radix Glycyrrhizae
3-[4,6-dihydroxy-2-methoxy-3-(3-methylbut-2-enyl)phenyl]-7-hydroxy-chromone	Arachidonate 5-lipoxygenase	Radix Glycyrrhizae
3-[4,6-dihydroxy-2-methoxy-3-(3-methylbut-2-enyl)phenyl]-7-hydroxy-chromone	5-hydroxytryptamine receptor 2A (5-HT-2A)	Radix Glycyrrhizae
3-[4,6-dihydroxy-2-methoxy-3-(3-methylbut-2-enyl)phenyl]-7-hydroxy-chromone	Estrogen-related receptor alpha	Radix Glycyrrhizae
3-[4,6-dihydroxy-2-methoxy-3-(3-methylbut-2-enyl)phenyl]-7-hydroxy-chromone	Estrogen receptor 1	Radix Glycyrrhizae
3-[4,6-dihydroxy-2-methoxy-3-(3-methylbut-2-enyl)phenyl]-7-hydroxy-chromone	Tubulin beta chain	Radix Glycyrrhizae
Licoflavonol	Cytochrome P450 1A1	Radix Glycyrrhizae
Licoflavonol	Tubulin beta chain	Radix Glycyrrhizae
Licoflavonol	Diacyl Glycerolacyltransferase 1 (DGAT1)	Radix Glycyrrhizae
Licoflavonol	Monoamine Oxidase Type B (MAO-B)	Radix Glycyrrhizae
Licoflavonol	Microtubule-associated protein tau	Radix Glycyrrhizae
Licoflavonol	Arachidonate 5-lipoxygenase	Radix Glycyrrhizae
Licoflavonol	Estradiol 17-beta-dehydrogenase 1	Radix Glycyrrhizae
Licoflavonol	Estrogen receptor 1	Radix Glycyrrhizae
Licoflavonol	Estrogen-related receptor alpha	Radix Glycyrrhizae
Licoflavonol	5-hydroxytryptamine receptor 2A (5-HT-2A)	Radix Glycyrrhizae
Morusin	GRB2	Radix Glycyrrhizae
Morusin	Estradiol 17-beta-dehydrogenase 1	Radix Glycyrrhizae
Morusin	Arachidonate 5-lipoxygenase	Radix Glycyrrhizae
glyasperin F	5-hydroxytryptamine receptor 2A (5-HT-2A)	Radix Glycyrrhizae
glyasperin F	Amiloride-sensitive cation channel 3	Radix Glycyrrhizae
glyasperin F	Estradiol 17-beta-dehydrogenase 1	Radix Glycyrrhizae
glyasperin F	Arachidonate 5-lipoxygenase	Radix Glycyrrhizae
Liquiritigenin	17-beta-Hydroxysteroid Dehydrogenase 1 (17-beta-HSD1)	Radix Glycyrrhizae
Liquiritigenin	HTR2C	Radix Glycyrrhizae
Liquiritigenin	Monoamine Oxidase B	Radix Glycyrrhizae
Liquiritigenin	Large conductance calcium-activated potassium channel subfamily M alpha member 1 isoform b	Radix Glycyrrhizae
Liquiritigenin	Lysine-specific demethylase 4D-like	Radix Glycyrrhizae
Liquiritigenin	Monoamine Oxidase Type B (MAO-B)	Radix Glycyrrhizae
Liquiritigenin	5-hydroxytryptamine receptor 2A (5-HT-2A)	Radix Glycyrrhizae
Liquiritigenin	Arachidonate 5-lipoxygenase	Radix Glycyrrhizae
Liquiritigenin	Tubulin beta chain	Radix Glycyrrhizae
Gancaonin B	Microtubule-associated protein tau	Radix Glycyrrhizae
Gancaonin B	Estrogen receptor 1	Radix Glycyrrhizae
Gancaonin B	5-hydroxytryptamine receptor 2A (5-HT-2A)	Radix Glycyrrhizae
Gancaonin B	Estrogen-related receptor alpha	Radix Glycyrrhizae
Gancaonin B	Tubulin beta-1 chain	Radix Glycyrrhizae
Odoratin	Cytochrome P450 1A1	Radix Glycyrrhizae
Odoratin	Tubulin beta chain	Radix Glycyrrhizae
Odoratin	Microtubule-associated protein tau	Radix Glycyrrhizae
Odoratin	Platelet-derived growth factor receptor beta	Radix Glycyrrhizae
Odoratin	Estrogen-related receptor alpha	Radix Glycyrrhizae
Odoratin	Monoamine Oxidase Type B (MAO-B)	Radix Glycyrrhizae
Odoratin	Arachidonate 5-lipoxygenase	Radix Glycyrrhizae
Odoratin	Estrogen receptor 1	Radix Glycyrrhizae
Odoratin	Tubulin beta-1 chain	Radix Glycyrrhizae
Odoratin	5-hydroxytryptamine receptor 2A (5-HT-2A)	Radix Glycyrrhizae
glyasperin B	Estrogen receptor 1	Radix Glycyrrhizae
glyasperin B	Microtubule-associated protein tau	Radix Glycyrrhizae
glyasperin B	5-hydroxytryptamine receptor 2A (5-HT-2A)	Radix Glycyrrhizae
glyasperin B	Arachidonate 5-lipoxygenase	Radix Glycyrrhizae
glyasperin B	Estrogen-related receptor alpha	Radix Glycyrrhizae
glyasperin B	Glutamate [NMDA] receptor subunit epsilon 2	Radix Glycyrrhizae
5,7-dihydroxy-3-(2-hydroxy-4-methoxy-phenyl)-6-(3-methylbut-2-enyl)chromone	5-hydroxytryptamine receptor 2A (5-HT-2A)	Radix Glycyrrhizae
5,7-dihydroxy-3-(2-hydroxy-4-methoxy-phenyl)-6-(3-methylbut-2-enyl)chromone	Cytochrome P450 1A1	Radix Glycyrrhizae
5,7-dihydroxy-3-(2-hydroxy-4-methoxy-phenyl)-6-(3-methylbut-2-enyl)chromone	Estrogen-related receptor alpha	Radix Glycyrrhizae
5,7-dihydroxy-3-(2-hydroxy-4-methoxy-phenyl)-6-(3-methylbut-2-enyl)chromone	Estrogen receptor 1	Radix Glycyrrhizae
5,7-dihydroxy-3-(2-hydroxy-4-methoxy-phenyl)-6-(3-methylbut-2-enyl)chromone	Diacyl Glycerolacyltransferase 1 (DGAT1)	Radix Glycyrrhizae
5,7-dihydroxy-3-(2-hydroxy-4-methoxy-phenyl)-6-(3-methylbut-2-enyl)chromone	Microtubule-associated protein tau	Radix Glycyrrhizae
5,7-dihydroxy-3-(2-hydroxy-4-methoxy-phenyl)-6-(3-methylbut-2-enyl)chromone	Kruppel-like factor 5	Radix Glycyrrhizae
5,7-dihydroxy-3-(2-hydroxy-4-methoxy-phenyl)-6-(3-methylbut-2-enyl)chromone	Arachidonate 5-lipoxygenase	Radix Glycyrrhizae
formononetin	Microtubule-associated protein tau	Radix Glycyrrhizae
formononetin	Monoamine Oxidase Type B (MAO-B)	Radix Glycyrrhizae
formononetin	Monoamine Oxidase B	Radix Glycyrrhizae
formononetin	Estrogen-related receptor alpha	Radix Glycyrrhizae
formononetin	tRNA-guanine transglycosylase	Radix Glycyrrhizae
formononetin	Guanine deaminase	Radix Glycyrrhizae
formononetin	SUMO-1-specific protease	Radix Glycyrrhizae
formononetin	Dual specificity tyrosine-phosphorylation-regulated kinase 1A	Radix Glycyrrhizae
formononetin	Tubulin beta chain	Radix Glycyrrhizae
formononetin	Estrogen receptor 1	Radix Glycyrrhizae
Isosinensetin	Tubulin beta chain	Immature Bitter Orange
Isosinensetin	Platelet-derived growth factor receptor beta	Immature Bitter Orange
Isosinensetin	Tubulin beta-1 chain	Immature Bitter Orange
Isosinensetin	5-hydroxytryptamine receptor 2A (5-HT-2A)	Immature Bitter Orange
Isosinensetin	Cytochrome P450 1A1	Immature Bitter Orange
Isosinensetin	Nitric Oxide Synthase, brain	Immature Bitter Orange
Corylifolinin	Integrin alpha-IIb	Radix Glycyrrhizae
Corylifolinin	Tubulin beta chain	Radix Glycyrrhizae
Corylifolinin	5-hydroxytryptamine receptor 2A (5-HT-2A)	Radix Glycyrrhizae
poncimarin	5-hydroxytryptamine receptor 2A (5-HT-2A)	Immature Bitter Orange
poncimarin	Brain adenylate cyclase 1	Immature Bitter Orange
poncimarin	Amiloride-sensitive cation channel 3	Immature Bitter Orange
Isoglycyrol	Phosphodiesterase 2A	Radix Glycyrrhizae
Isoglycyrol	GRB2	Radix Glycyrrhizae
Glyasperins M	Tubulin beta-1 chain	Radix Glycyrrhizae
Glyasperins M	Amiloride-sensitive cation channel 3	Radix Glycyrrhizae
Glyasperins M	5-hydroxytryptamine receptor 2A (5-HT-2A)	Radix Glycyrrhizae
Glyasperins M	Arachidonate 5-lipoxygenase	Radix Glycyrrhizae
3',4',5,7-Tetramethoxyflavone	5-hydroxytryptamine receptor 2A (5-HT-2A)	Immature Bitter Orange
3',4',5,7-Tetramethoxyflavone	Cytochrome P450 1A1	Immature Bitter Orange
3',4',5,7-Tetramethoxyflavone	Tubulin beta-1 chain	Immature Bitter Orange
3',4',5,7-Tetramethoxyflavone	Tubulin beta chain	Immature Bitter Orange
3',4',5,7-Tetramethoxyflavone	Platelet-derived growth factor receptor beta	Immature Bitter Orange
Glabrene	Estradiol 17-beta-dehydrogenase 1	Radix Glycyrrhizae
Glabrene	5-hydroxytryptamine receptor 2A (5-HT-2A)	Radix Glycyrrhizae
Sainfuran	Microtubule-associated protein tau	Radix Bupleuri
Sainfuran	Tubulin beta chain	Radix Bupleuri
Sainfuran	Monoamine Oxidase Type B (MAO-B)	Radix Bupleuri
Sainfuran	Estrogen-related receptor alpha	Radix Bupleuri
Sainfuran	Monoamine Oxidase B	Radix Bupleuri
Sainfuran	Tubulin beta-1 chain	Radix Bupleuri
Gancaonin G	Tubulin beta chain	Radix Glycyrrhizae
Gancaonin G	Arachidonate 5-lipoxygenase	Radix Glycyrrhizae
Gancaonin G	Estrogen-related receptor alpha	Radix Glycyrrhizae
Gancaonin G	5-hydroxytryptamine receptor 2A (5-HT-2A)	Radix Glycyrrhizae
Gancaonin G	Tubulin beta-1 chain	Radix Glycyrrhizae
Gancaonin G	Estrogen receptor 1	Radix Glycyrrhizae
Shinflavanone	Estradiol 17-beta-dehydrogenase 1	Radix Glycyrrhizae
Shinflavanone	5-hydroxytryptamine receptor 2A (5-HT-2A)	Radix Glycyrrhizae
Octalupine	Dopamine D3 receptor	Radix Bupleuri
Octalupine	CHRM4	Radix Bupleuri
Octalupine	Cholinergic, muscarinic	Radix Bupleuri
Octalupine	Acetylcholine-binding protein	Radix Bupleuri
Octalupine	Cholinergic, Nicotinic Alpha7	Radix Bupleuri
Octalupine	Dual specificity mitogen-activated protein kinase kinase 4	Radix Bupleuri
Octalupine	Steroid 5-alpha-reductase 1	Radix Bupleuri
Octalupine	Synaptic vesicle protein 2a	Radix Bupleuri
Octalupine	Cholinergic, Nicotinic Alpha7	Radix Bupleuri
Octalupine	5-hydroxytryptamine (serotonin) receptor 2B [Homo sapiens]	Radix Bupleuri
Octalupine	Vesicular acetylcholine transporter	Radix Bupleuri
Octalupine	acetylcholine receptor (alpha4beta2 nAChR)	Radix Bupleuri
Octalupine	Sigma opioid receptor	Radix Bupleuri
Octalupine	Kappa Opioid Receptor	Radix Bupleuri
Octalupine	Cholinergic, Nicotinic Alpha4Beta2	Radix Bupleuri
glyasperins D	5-hydroxytryptamine receptor 2A (5-HT-2A)	Radix Glycyrrhizae
glyasperins D	Estrogen receptor 1	Radix Glycyrrhizae
glyasperins D	Tubulin beta chain	Radix Glycyrrhizae
glyasperins D	Tubulin beta-1 chain	Radix Glycyrrhizae
glyasperins D	Potassium/sodium hyperpolarization-activated cyclic nucleotide-gated channel 1	Radix Glycyrrhizae
8-(6-hydroxy-2-benzofuranyl)-2,2-dimethyl-5-chromenol	5-hydroxytryptamine receptor 2A (5-HT-2A)	Radix Glycyrrhizae
8-(6-hydroxy-2-benzofuranyl)-2,2-dimethyl-5-chromenol	Dual specificity mitogen-activated protein kinase kinase 4	Radix Glycyrrhizae
Glabridin	Glutamate [NMDA] receptor subunit epsilon 2	Radix Glycyrrhizae
Glabridin	Estrogen receptor 1	Radix Glycyrrhizae
Glabridin	Estrogen-related receptor alpha	Radix Glycyrrhizae
Glabridin	Estradiol 17-beta-dehydrogenase 1	Radix Glycyrrhizae
Glabridin	Amiloride-sensitive cation channel 3	Radix Glycyrrhizae
Glabridin	Microtubule-associated protein tau	Radix Glycyrrhizae
Glabridin	5-hydroxytryptamine receptor 2A (5-HT-2A)	Radix Glycyrrhizae
isoglabrolide	Tubulin beta-1 chain	Radix Glycyrrhizae
isoglabrolide	5-hydroxytryptamine receptor 2A (5-HT-2A)	Radix Glycyrrhizae
isoglabrolide	Monocarboxylate Transporter 1	Radix Glycyrrhizae
isoglabrolide	mothers against decapentaplegic homolog 3	Radix Glycyrrhizae
isoglabrolide	Beta tubulin	Radix Glycyrrhizae
isoglabrolide	Dual specificity mitogen-activated protein kinase kinase 4	Radix Glycyrrhizae
Phaseolinisoflavan	Estradiol 17-beta-dehydrogenase 1	Radix Glycyrrhizae
Phaseolinisoflavan	Microtubule-associated protein tau	Radix Glycyrrhizae
Phaseolinisoflavan	5-hydroxytryptamine receptor 2A (5-HT-2A)	Radix Glycyrrhizae
Phaseolinisoflavan	Glutamate [NMDA] receptor subunit epsilon 2	Radix Glycyrrhizae
Medicarpin	5-hydroxytryptamine receptor 2A (5-HT-2A)	Radix Glycyrrhizae
Medicarpin	Monoamine Oxidase Type B (MAO-B)	Radix Glycyrrhizae
Medicarpin	Glutamate [NMDA] receptor subunit epsilon 2	Radix Glycyrrhizae
Medicarpin	Monoamine Oxidase B	Radix Glycyrrhizae
Medicarpin	Tubulin beta chain	Radix Glycyrrhizae
Medicarpin	Lysine-specific demethylase 4D-like	Radix Glycyrrhizae
Medicarpin	Estrogen receptor 1	Radix Glycyrrhizae
Medicarpin	Estrogen-related receptor alpha	Radix Glycyrrhizae
Kanzonol F	Estrogen-related receptor alpha	Radix Glycyrrhizae
Kanzonol F	Beta tubulin	Radix Glycyrrhizae
Kanzonol F	Tubulin beta-1 chain	Radix Glycyrrhizae
Kanzonol F	GRB2	Radix Glycyrrhizae
Kanzonol F	5-hydroxytryptamine receptor 2A (5-HT-2A)	Radix Glycyrrhizae
α-spinasterol	Sodium/potassium-transporting ATPase alpha-1 chain	Radix Bupleuri
α-spinasterol	Mu opioid receptor	Radix Bupleuri
α-spinasterol	Thyroid oxidase 2	Radix Bupleuri
α-spinasterol	Brain adenylate cyclase 1	Radix Bupleuri
α-spinasterol	Steroid 5-alpha-reductase 1	Radix Bupleuri
α-spinasterol	Mineralocorticoid receptor	Radix Bupleuri
α-spinasterol	androgen	Radix Bupleuri
beta-sitosterol	Microtubule-associated protein tau	Radix Paeoniae Alba
beta-sitosterol	Brain adenylate cyclase 1	Radix Paeoniae Alba
beta-sitosterol	Mu opioid receptor	Radix Paeoniae Alba
beta-sitosterol	Thyroid oxidase 2	Radix Paeoniae Alba
beta-sitosterol	Kruppel-like factor 5	Radix Paeoniae Alba
beta-sitosterol	Mineralocorticoid receptor	Radix Paeoniae Alba
beta-sitosterol	Sodium/potassium-transporting ATPase alpha-1 chain	Radix Paeoniae Alba
beta-sitosterol	Diacyl Glycerolacyltransferase 1 (DGAT1)	Radix Paeoniae Alba
beta-sitosterol	Steroid 5-alpha-reductase 1	Radix Paeoniae Alba
Stigmasterol	Brain adenylate cyclase 1	Radix Bupleuri
Stigmasterol	Thyroid oxidase 2	Radix Bupleuri
Stigmasterol	Microtubule-associated protein tau	Radix Bupleuri
Stigmasterol	Mu opioid receptor	Radix Bupleuri
Stigmasterol	Sodium/potassium-transporting ATPase alpha-1 chain	Radix Bupleuri
Stigmasterol	Mineralocorticoid receptor	Radix Bupleuri
Stigmasterol	Steroid 5-alpha-reductase 1	Radix Bupleuri
